# Supplementary material for: PNIPAM-based heteroarm star-graft quarterpolymers: synthesis, characterization and pH-dependent thermoresponsiveness in aqueous media
Source: Royal Society of Chemistry journal article supplement (doi:10.1039/c5py00393h), 2015-01-01
Supplement: c5py00393h1.pdf [file c5py00393h1.pdf]

## Supporting Information for

### PNIPAM-based Heteroarm Star-Graft Quarterpolymers: Synthesis, Characterization and pH-Dependent Thermoresponsiveness in Aqueous Media

Zacharoula Iatridi,<sup>a</sup> M.M. Soledad Lencina<sup>a</sup> and Constantinos Tsitsilianis<sup>\*a,b</sup>

<sup>a</sup>Department of Chemical Engineering, University of Patras, 26504 Patras, Greece.

E-mail: ct@chemeng.upatras.gr; Fax: +30 2610 997266; Tel: +30 2610 969531

<sup>b</sup>Institute of Chemical Engineering Sciences ICE/HT-FORTH, P.O. Box 1414, 26504 Patras, Greece

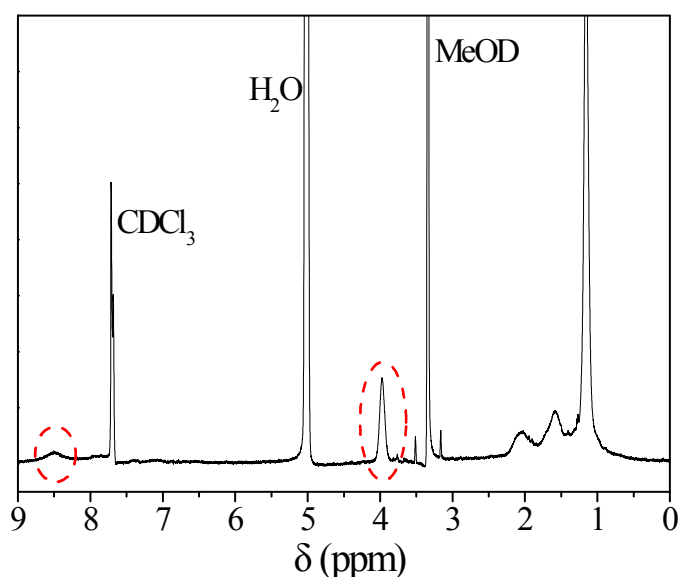

**Fig. S1.** <sup>1</sup>H-NMR spectrum of S<sub>3422</sub>(V<sub>136-b</sub>-A<sub>119-g</sub>-N<sub>484</sub>)<sub>22</sub>.

The grafting density of the star-graft quarterpolymers, expressed as the average number of PNIPAM chains per PAA arms (equal to P2VP arms), was determined by <sup>1</sup>H-NMR in a mixture of deuterated solvents MeOD/CDCl<sub>3</sub> (3/2 v/v). The calculation of the grafting density was performed using the intensity ratio of the -CH- unit of the isopropylene group of PNIPAM (with a resonance at δ ~ 3.8–4.1 ppm) and the proton atom in the 3-position of the pyridine ring (with a resonance at δ ~ 8.3–8.7 ppm) in the following equation:

$$\text{grafting density} = \frac{\text{intensity ratio} * DP_{P2VP}}{DP_{PNIPAM}}$$

where  $DP_{P2VP}$  and  $DP_{PNIPAM}$  are the degrees of polymerization of P2VP and PNIPAM, respectively.

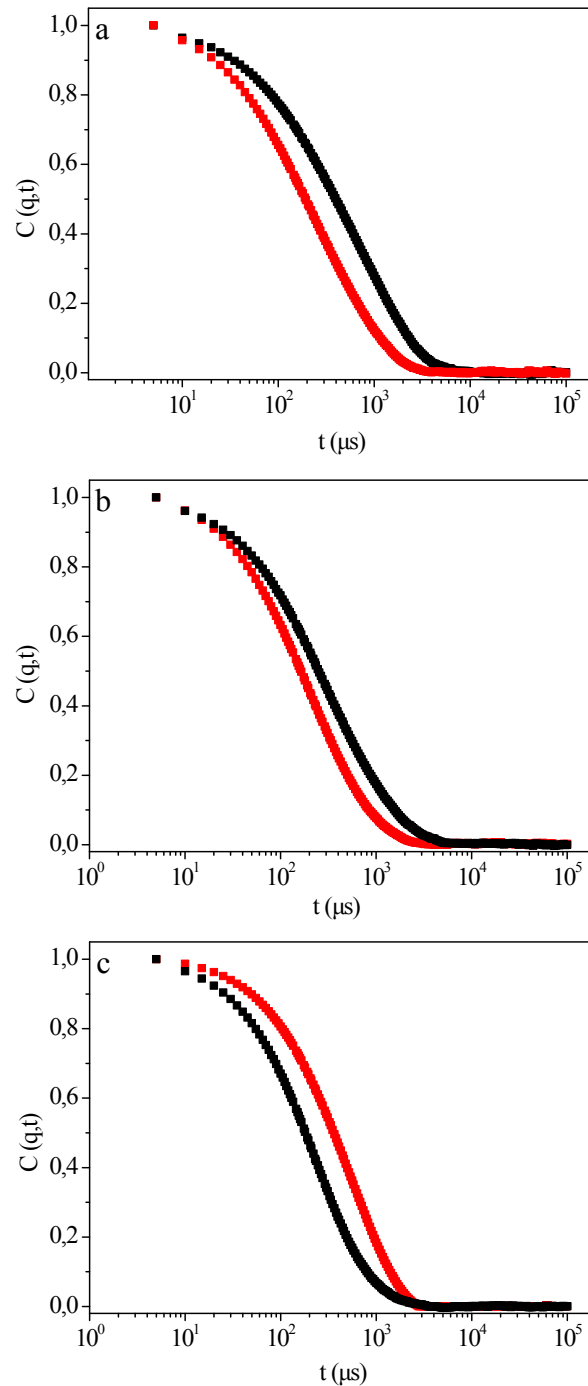

**Fig. S2.** Autocorrelation functions of 0.2 wt%  $S_{339}(V_{126-b-A69-g-N48_{3,4}})_9$  (a),  $S_{339}(V_{126-b-A69-g-N48_{4,5}})_9$  (b) and  $S_{339}(V_{126-b-A69-g-N48_{11}})_9$  (c) aqueous solutions measured at pH 8 and at 25°C (black color) or 45°C (red color).

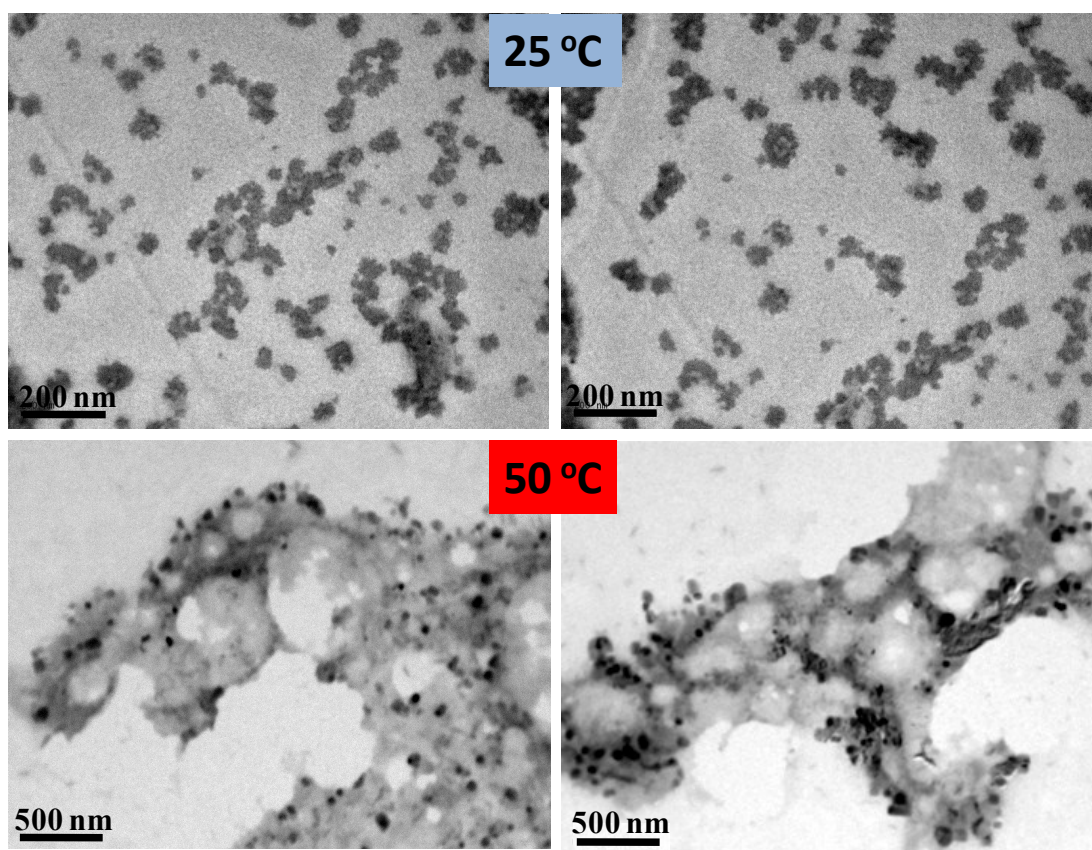

**Fig. S3.** TEM images of 0.006 wt% S<sub>339</sub>(V<sub>126</sub>-*b*-A<sub>69</sub>-*g*-N<sub>484.5</sub>)<sub>9</sub> aqueous solutions of pH 2.4 at 25 and 50°C.

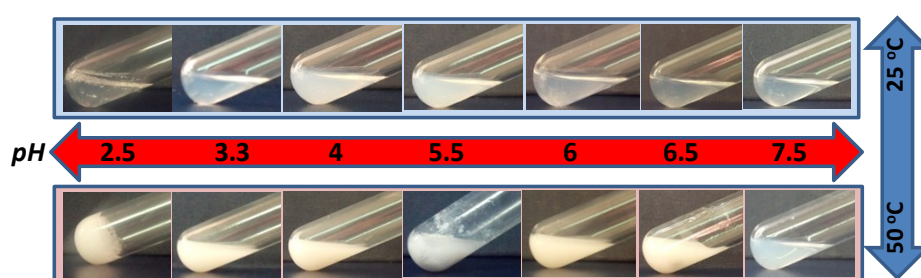

**Fig. S4.** Sol-gel phase behavior upon heating from 25°C (upper line) to 50°C (lower line) at various pH of S<sub>3422</sub>(V<sub>136</sub>-*b*-A<sub>119</sub>-*g*-N<sub>484</sub>)<sub>22</sub> ( $C_p=3$  wt%).
